# Supplementary material
Source: publisher figshare collection journal article supplement (https://acs.figshare.com/ndownloader/files/9994717)
Supplement: Supplementary file 1 [file 9994717]

## Sheet: SI_Glycan_List
Glycan Name	H	N	F	S		Mass_Glycan	Mass_Glycan-TMT		Detected				Quantified
									MultiNotch MS3	Standard MS3	MS2		MultiNotch MS3	Standard MS3	Low Energy MS2	High Energy MS2
H3N2	3	2	0	0		910.328	1211.56		√	√	√
H3N2F	3	2	1	0		1056.39	1357.62		√	√	√			√
H4N2	4	2	0	0		1072.38	1373.61		√	√	√		√	√	√	√
H3N3	3	3	0	0		1113.41	1414.64		√	√
H5N2	5	2	0	0		1234.43	1535.67		√	√	√		√	√	√	√
H3N3F	3	3	1	0		1259.47	1560.7		√	√	√		√			√
H4N3	4	3	0	0		1275.46	1576.69		√	√	√		√		√	√
H3N4	3	4	0	0		1316.49	1617.72		√	√	√		√	√		√
H6N2	6	2	0	0		1396.49	1697.72		√	√	√		√	√	√	√
H4N3F	4	3	1	0		1421.52	1722.75		√	√	√		√	√		√
H5N3	5	3	0	0		1437.51	1738.74		√	√	√		√		√	√
H3N4F	3	4	1	0		1462.54	1763.78		√	√	√		√	√	√	√
H4N4	4	4	0	0		1478.54	1779.77		√	√	√		√	√	√	√
H3N5	3	5	0	0		1519.57	1820.8		√	√	√					√
H7N2	7	2	0	0		1558.54	1859.77		√	√	√		√		√	√
H4N4F	4	4	1	0		1624.6	1925.83		√	√	√		√	√	√	√
H5N4	5	4	0	0		1640.59	1941.82		√	√	√		√			√
H3N5F	3	5	1	0		1665.62	1966.86		√	√	√		√	√		√
H4N5	4	5	0	0		1681.62	1982.85		√	√	√		√
H8N2	8	2	0	0		1720.59	2021.82		√	√	√		√		√	√
H6N3F	6	3	1	0		1745.62	2046.86			√
H5N4F	5	4	1	0		1786.65	2087.88		√	√	√			√		√
H4N5F	4	5	1	0		1827.68	2128.91		√	√	√					√
H5N5	5	5	0	0		1843.67	2144.9		√
H9N2	9	2	0	0		1882.64	2183.88		√	√	√		√			√
H6N4F	6	4	1	0		1948.7	2249.93		√	√	√		√	√	√	√
H5N5F	5	5	1	0		1989.73	2290.96		√	√	√					√
H6N5	6	5	0	0		2005.72	2306.96		√
H10N2	10	2	0	0		2044.7	2345.93		√	√	√					√
H6N5F	6	5	1	0		2151.78	2453.01				√
H6N6	6	6	0	0		2208.8	2510.04		√
H7N7	7	7	0	0		2573.94	2875.17		√
H4N3S	4	3	0	1		1566.56	1867.79		√	√	√		√	√	√	√
H4N3FS	4	3	1	1		1712.61	2013.84		√	√	√
H5N3S	5	3	0	1		1728.61	2029.84		√	√	√		√	√	√	√
H4N4S	4	4	0	1		1769.63	2070.87		√	√	√				√	√
H5N3FS	5	3	1	1		1874.67	2175.9		√	√	√		√	√	√	√
H6N3S	6	3	0	1		1890.66	2191.89		√	√	√		√	√	√	√
H4N4FS	4	4	1	1		1915.69	2216.92		√	√	√		√		√	√
H5N4S	5	4	0	1		1931.69	2232.92		√	√	√		√	√		√
H4N5S	4	5	0	1		1972.71	2273.95		√	√	√		√		√	√
H6N3FS	6	3	1	1		2036.72	2337.95		√	√	√				√	√
H5N4FS	5	4	1	1		2077.75	2378.98		√	√	√			√		√
H6N4S	6	4	0	1		2093.74	2394.97		√	√	√		√	√	√	√
H4N5FS	4	5	1	1		2118.77	2420		√	√	√		√	√		√
H5N5S	5	5	0	1		2134.77	2436		√	√	√		√	√		√
H4N6S	4	6	0	1		2175.79	2477.03		√	√	√			√
H4N4F3S	4	4	3	1		2207.81	2509.04		√
H5N4F2S	5	4	2	1		2223.8	2525.04		√	√	√		√	√	√	√
H6N4FS	6	4	1	1		2239.8	2541.03		√	√	√		√		√	√
H5N5FS	5	5	1	1		2280.82	2582.06		√	√	√				√	√
H6N5S	6	5	0	1		2296.82	2598.05		√	√	√			√
H6N5FS	6	5	1	1		2442.88	2744.11		√	√	√		√	√	√	√
H6N6FS	6	6	1	1		2645.96	2947.19		√	√	√				√	√
H7N6S	7	6	0	1		2661.95	2963.18			√	√
H5N4S2	5	4	0	2		2222.78	2524.01		√	√	√		√	√		√
H5N4FS2	5	4	1	2		2368.84	2670.07		√	√	√		√			√
H5N5S2	5	5	0	2		2425.86	2727.09		√		√					√
H5N5FS2	5	5	1	2		2571.92	2873.15		√	√	√					√
H6N5S2	6	5	0	2		2587.92	2889.15		√	√	√					√
H6N5FS2	6	5	1	2		2733.97	3035.2		√	√	√				√	√
H7N6S2	7	6	0	2		2953.05	3254.28		√	√	√				√	√
H7N6FS2	7	6	1	2		3099.11	3400.34		√	√	√		√			√
H6N5S3	6	5	0	3		2879.01	3180.24		√	√	√		√			√
H6N5FS3	6	5	1	3		3025.07	3326.3		√	√	√
H6N5F2S3	6	5	2	3		3171.13	3472.36		√	√	√
H7N6S3	7	6	0	3		3244.14	3545.37		√	√	√					√
